# Supplementary material
Source: Research Square preprint supplement (doi:10.21203/rs.3.rs-9444264/v1)
Supplement: Supplementary file 1 [file d63e62a38c2dc91e4af78b7e.docx]

**Appendix A Field Survey Performa**

A structured field survey Performa was developed and used during the N-5 corridor survey to rapidly and consistently record the geometric and structural details of each bridge. The Performa covered nine sections:

- Section 1: Bridge identification (name, location, GPS coordinates, year built)
- Section 2: Bridge specification (type, number and length of spans, deck width, girder type, cross-section details, skew angle)
- Section 3: Substructure details (bearing type, pier type, pile cap and pile data)
- Section 4: Abutment type (open-end or closed-end, material)
- Section 5: Geotechnical investigation (soil type, river type)
- Section 6: Site information (topographic setting)
- Section 7: Material strengths (compressive strength of concrete by element)
- Section 8: Damage assessment (element-by-element severity rating)
- Section 9: Serviceability and inspection accuracy rating

A sample completed Performa for the Taxila Bridge (Form No. 5, dated 23 September 2011) is included in the original project report as Annexure 1. The Taxila Bridge data used in Table 5 of this paper was drawn directly from that document.
